# Supplementary material for: Multidrug resistance transporter-1 dysfunction perturbs meiosis and Ca2+ homeostasis in oocytes
Source: PubMed Central journal article supplement (PMC9782432; doi:10.1530/rep-22-0192), 2022-10-10

A.

wild type

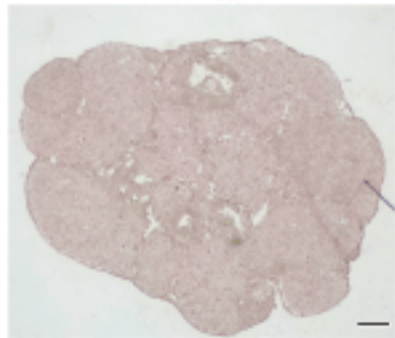*Mdr1* mutant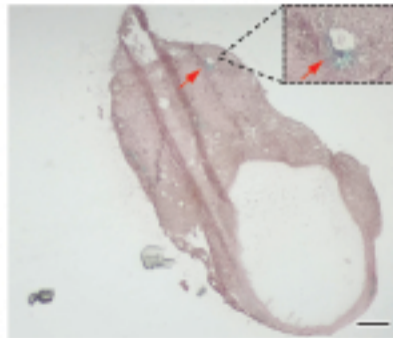

B.

X-Gal positive follicles

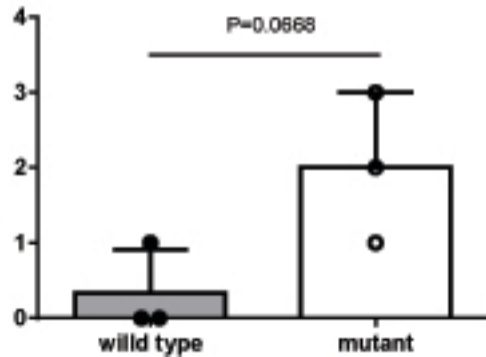

Supplement: supplementary_figure_3.pdf [file supplementary_figure_3.pdf]
