# Supplementary material for: Multidrug resistance transporter-1 dysfunction perturbs meiosis and Ca2+ homeostasis in oocytes
Source: PubMed Central journal article supplement (PMC9782432; doi:10.1530/rep-22-0192), 2022-10-10

Wild type  
MDR1 mutant

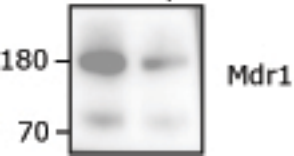

Supplement: supplementary_figure_4.pdf [file supplementary_figure_4.pdf]
